# Supplementary material for: Five-Year Clinical Outcomes after Neoadjuvant Nivolumab in Resectable Non–Small Cell Lung Cancer
Source: PubMed Central journal article supplement — Clin Cancer Res. 2023 Feb 15;29(4):705–10. doi: 10.1158/1078-0432.CCR-22-2994 (PMC9932577; doi:10.1158/1078-0432.ccr-22-2994), 2023-02-15
Supplement: ccr-22-2994_figure_s2_suppfs2.pdf [file ccr-22-2994_figure_s2_suppfs2.pdf]

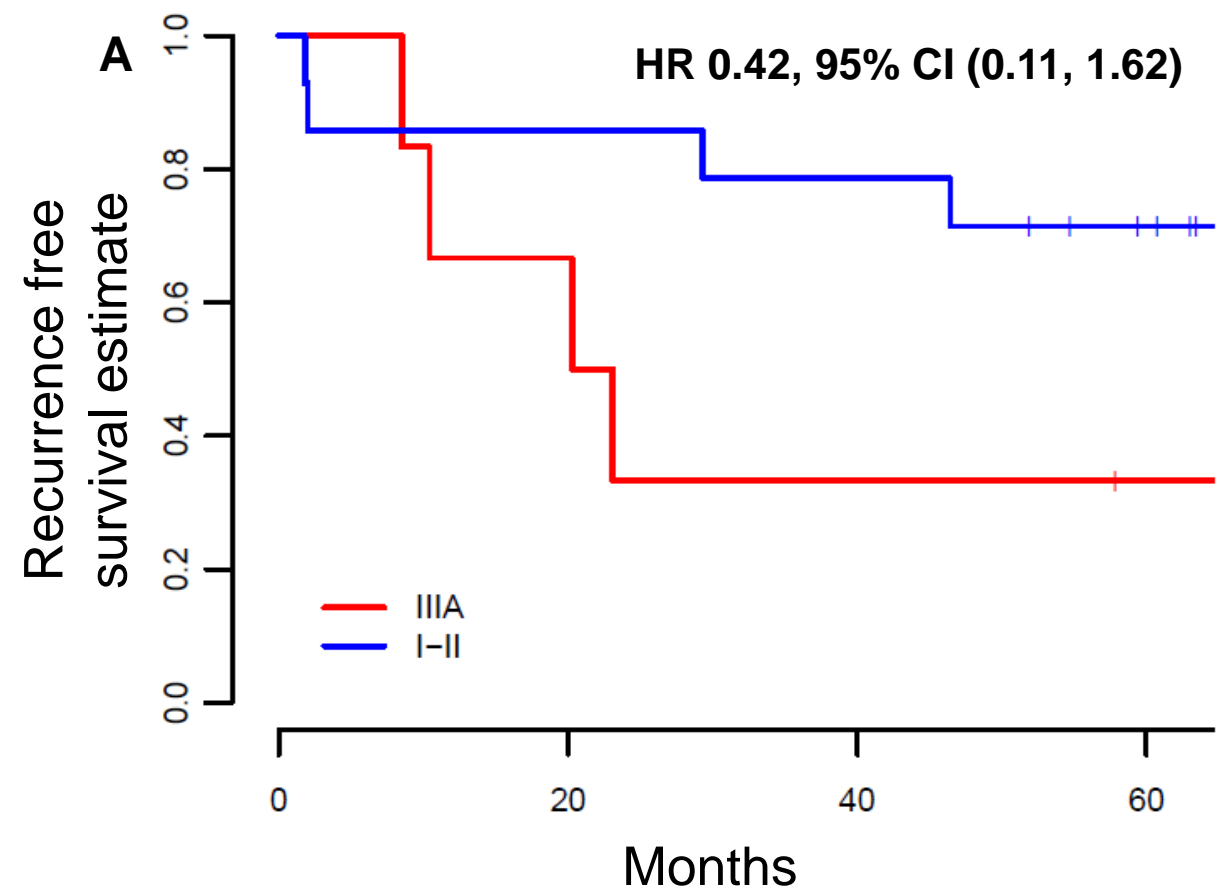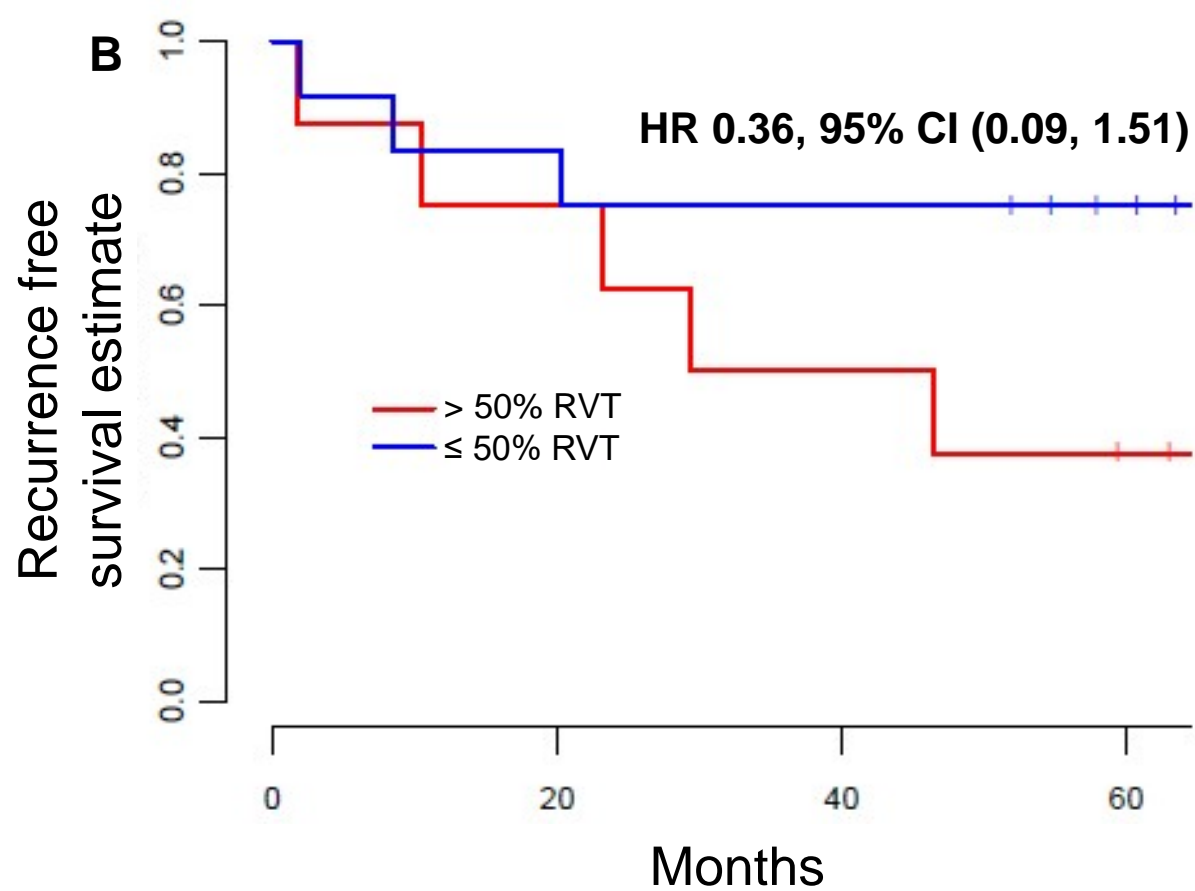

1 **Supplemental Figure 2 (A-B):** Kaplan-Meier curves for recurrence free survival  
2 stratified based on patient stage at diagnosis (A) and by percentage of residual viable  
3 tumor at time of resection (B), using a threshold of 50%. Abbreviations: Percent residual  
4 viable Tumor (%RVT); Hazard ratio (HR); Confidence interval (CI).
